# Supplementary material for: The Association Between Adolescent Adhd and Callous-unemotional Traits is Moderated by Electrophysiological Reinforcement Sensitivity
Source: Research Square preprint supplement (doi:10.21203/rs.3.rs-4236701/v1), 2024-04-12
Supplement: Supplementary file 1 [file 1bff255ebe8224cc391fde46.docx]

**SUPPLEMENTARY INFORMATION TO:**

**THE ASSOCIATION BETWEEN ADOLESCENT ADHD AND CALLOUS-UNEMOTIONAL TRAITS**

**IS MODERATED BY ELECTROPHYSIOLOGICAL REINFORCEMENT SENSITIVITY**

***Parent-report measures***

***ADHD Rating Scale-5 (ARS 5).*** TheARS-5 [1] is a 30-itemparent- and teacher-report measure of the past 6-month presence and severity of DSM-5 ADHD symptoms (9 inattentive symptom items and 9 hyperactivity/impulsivity symptom items) and functional impairment across six domains: relationship with significant others (family members for the home version), relationship with peers, academic functioning, behavioral functioning, homework performance and self-esteem (2×6 impairment items, with one set corresponding to inattention and one to hyperactivity/impulsivity). Parents and teachers rate items on a four-point scale ranging in case of symptoms from 0 (never or rarely) to 4 (very often) and in case of impairment from 0 (“no problem”) to 3 (“severe problem”), with higher scores indicating more severe symptoms and impairment. The ARS-5 is comprised of two symptoms scales, Inattention and Hyperactivity-Impulsivity, and a Total Scale. The ARS-5 is suitable for ages 5-17 years, with separate forms for children (5-10 years) and adolescents (11—17 years) and age-appropriate and DSM-5 compatible descriptions of symptoms. In the current study, the adolescent home (i.e., parent-report) version was used. Prior findings indicate both the original (e.g., internal consistency and 6-week test-retest reliability; factor structure; concurrent validity and predictive validity and clinical utility)[1] and the Hungarian translation (internal consistency) [2, 3] have acceptable psychometric properties. In the current sample, the ARS-5 IA (ω=.947) and H/I (ω=.921) subscales as well as the Total score exhibited acceptable internal consistency (ω=.963); subscales were used for ADHD classification and subscales and Total were used in analyses.

***Inventory of Callous Unemotional Traits (ICU).*** The ICU (Frick, 2004) is a 24-item self-report measure of CU traits, comprised of three subscales, Callousness, Uncaring, and Unemotional. Respondents rate items on a four-point scale ranging from 0 (not at all true) to 3 (definitely true). Higher scores indicate greater CU traits. Prior meta-analytic findings indicate both the original [4] and the Hungarian translation [5] ICU subscales have acceptable psychometric properties. In the current sample, the Callousness (ω=.697) and Uncaring (ω=.766) subscales exhibited acceptable internal consistency, however, as also indicated by meta-analytic findings [6], the Unemotional subscale exhibited unacceptable internal consistency (ω=.583) (Cardinale & Marsh, 2020); Callousness and Uncaring subscales were used in analyses.

***Disruptive Behaviour Disorders Rating Scale (DBD-RS)*.** The DBD-RS [7] is a 45-item parent- and teacher-report measure of the presence and severity of DSM-III-R ADHD symptoms (9 inattentive symptom items and 9 hyperactivity/impulsivity symptom items), ODD (8 items), and CD symptoms (15 items). Parents and teachers rate items on a four-point scale ranging 0 (not at all) to 3 (very much), with higher scores indicating more severe symptoms. In the current study, the parent-report form was used and the ODD and CD items were of interest. Because items reflect DSM-III-R symptom wording, those were modified to match DSM-5 symptom wording [8]. Prior findings indicate both the original (e.g., factor structure and internal consistency [7, 9–11] and the Hungarian translation (internal consistency) [12] have acceptable psychometric properties. In the current sample, the ODD subscale exhibited acceptable internal consistency (ω=.921) and was used in analyses.

**Monetary Incentive Delay (MID) task**

The MID task [13, 14] was used to probe reward anticipation and initial responsiveness to reward attainment. A total of 240 trials were presented in five blocks of 12 trials/ condition. During the task, participants responded to a sequence of geometric shapes indicating money (1000 HUF) can be gained (e.g., crossed circle, i.e., a win condition), or loss of money can be avoided (e.g., crossed square, i.e., a loss condition), or that it is a neutral trial (e.g., empty circle or square, i.e., two neutral conditions, a neutral gain and a neutral loss condition), with no monetary consequence. Following each cue (2000 ms duration), there was an anticipatory phase (duration between 2000 and 2500 ms). During the anticipatory phase, participants waited for and were briefly presented with a target stimulus that they had to quickly respond to with button press to gain or avoid losing money. Success or failure was indicated on the computer screen (2000 ms feedback duration), and so was the cumulative total money won. The duration of the intertrial interval was between 1000 and 2000 ms. The duration of the target stimulus was determined before the first block using a shorter training block. The target duration was set to a winning chance of 66%. Trials corresponding to different conditions were presented in a random order. For ERP variables used in the current study, see Analytic Plan. To maximize effectiveness of the experimental manipulation, participants were told that the virtual money they accumulated can be exchanged for snacks (candy, chips, etc.).

**References**

1. DuPaul GJ, Power TJ, Anastopoulos AD, Reid R (2016) ADHD Rating Scale-5 for Children and Adolescents. The Guilford Press, New York - London

2. Bunford N, Hámori G, Nemoda Z, et al (2023) The domain-variant indirect association between electrophysiological response to reward and ADHD presentations is moderated by dopaminergic polymorphisms. Compr Psychiatry 124:152389. https://doi.org/10.1016/j.comppsych.2023.152389

3. Hámori G, File B, Fiáth R, et al (2023) Adolescent ADHD and electrophysiological reward responsiveness: A machine learning approach to evaluate classification accuracy and prognosis. Psychiatry Research 323:115139. https://doi.org/10.1016/j.psychres.2023.115139

4. Ray JV, Frick PJ (2020) Assessing Callous-Unemotional Traits Using the Total Score from the Inventory of Callous-Unemotional Traits: A Meta-Analysis. J Clin Child Adolesc Psychol 49:190–199. https://doi.org/10.1080/15374416.2018.1504297

5. Szabó E (2019) A rideg-érzéketlen (CU) vonások összefüggései az érzelmi feldolgozással. Eötvös Loránd Tudományegyetem, Pedagógiai és Pszichológiai Kar, Pszichológiai Doktori Iskola

6. Cardinale EM, Marsh AA (2020) The Reliability and Validity of the Inventory of Callous Unemotional Traits: A Meta-Analytic Review. Assessment 27:57–71. https://doi.org/10.1177/1073191117747392

7. Pillow DR, Pelham WE, Hoza B, et al (1998) Confirmatory factor analyses examining attention deficit hyperactivity disorder symptoms and other childhood disruptive behaviors. Journal of Abnormal Child Psychology 26:293–309. https://doi.org/10.1023/A:1022658618368

8. American Psychiatric Association (2013) Diagnostic and Statistical Manual of Mental Disorders, 5th Edition (DSM-5). Diagnostic and Statistical Manual of Mental Disorders 4th edition TR 280. https://doi.org/10.1176/appi.books.9780890425596.744053

9. Owens JS, Hoza B (2003) Conditional probabilities of disruptive behavior disorder symptoms predicting DSM-IV ADHD subtypes and ODD. Journal of Attention Disorders 7:11–28

10. van Eck K, Finney SJ, Evans SW (2010) Parent report of adhd symptoms of early adolescents: A confirmatory factor analysis of the disruptive behavior disorders scale. Educational and Psychological Measurement 70:. https://doi.org/10.1177/0013164410378093

11. Bunford N, Brandt NE, Golden C, et al (2015) Attention-Deficit/Hyperactivity Disorder Symptoms Mediate the Association between Deficits in Executive Functioning and Social Impairment in Children. Journal of Abnormal Child Psychology 43:133–147. https://doi.org/10.1007/s10802-014-9902-9

12. Rádosi A, Ágrez K, Pászthy B, et al (2023) Concurrent and Prospective Associations of Reward Response with Affective and Alcohol Problems: ADHD-Related Differential Vulnerability. J Youth Adolesc. https://doi.org/10.1007/s10964-023-01794-7

13. Knutson B, Fong GW, Adams CM, et al (2001) Dissociation of reward anticipation and outcome with event-related fMRI. NeuroReport 12:3683–3687. https://doi.org/10.1097/00001756-200112040-00016

14. Knutson B, Fong GW, Bennett SM, et al (2003) A region of mesial prefrontal cortex tracks monetarily rewarding outcomes: Characterization with rapid event-related fMRI. NeuroImage 18:263–272. https://doi.org/10.1016/S1053-8119(02)00057-5
